# Supplementary material
Source: PubMed Central journal article supplement (PMC4098795)

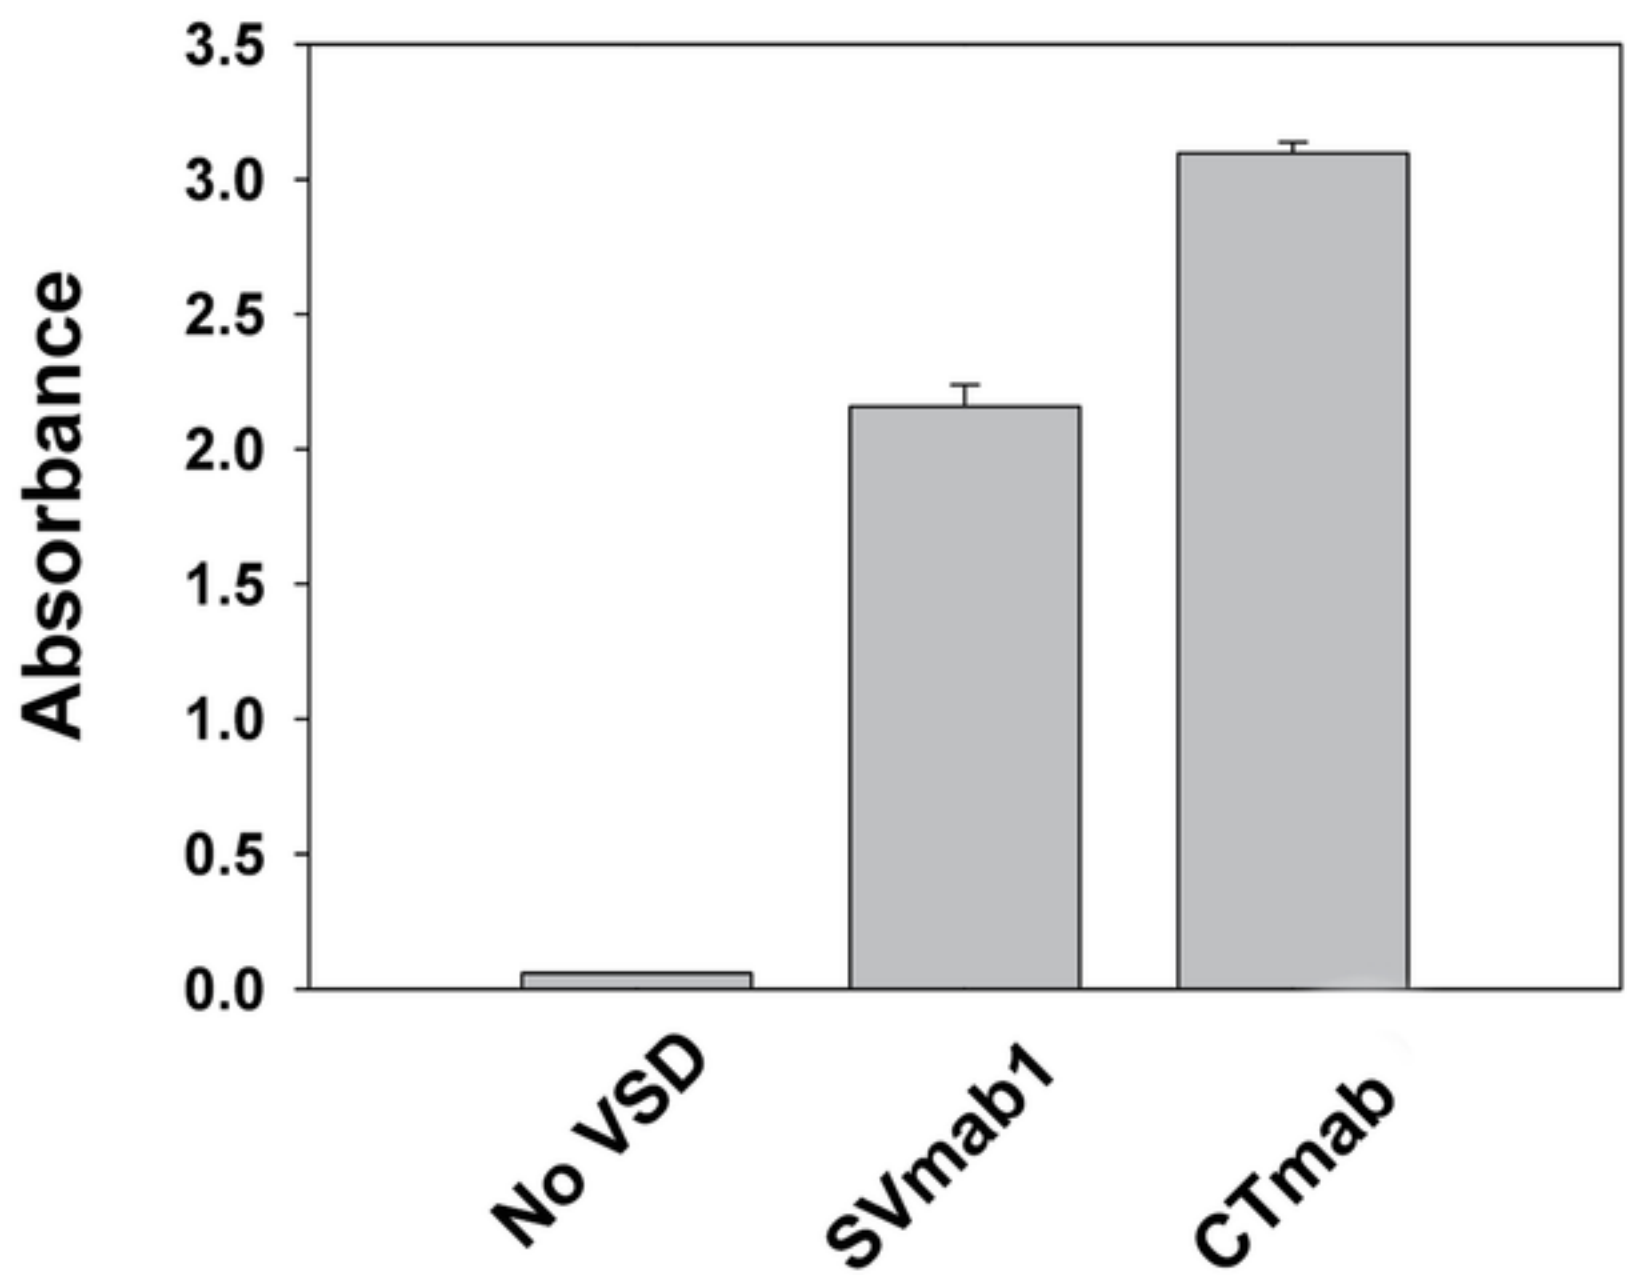

**A**

hNav1.7 LSLVELF--LADVEGLSVLR  
 hNav1.1 LSLMELG--LANVEGLSVLR  
 hNav1.2 LSLMELG--LANVEGLSVLR  
 hNav1.3 LSLMELG--LSNVEGLSVLR  
 hNav1.4 LSLVELG--LANVQGLSVLR  
 hNav1.5 LSLMELG--LSRMSNLSVLR  
 hNav1.6 LSLMELS--LADVEGLSVLR  
 hNav1.8 VSLLELG--VAKKGSLSVLR  
 hNav1.9 LSFADVMNCVLQKRSWPFLR

**B**

hNav1.7 LSLVELF--LADVEGLSVLR  
 hNav1.1 LSLMELG--LANVEGLSVLR  
 rNav1.2 LSLMELG--LANVEGLSVLR  
 hNav1.3 LSLMELG--LSNVEGLSVLR  
 rNav1.4 LSLVELG--LANVQGLSVLR  
 mNav1.5 LSLMELG--LSRMGNLSVLR  
 mNav1.6 LSLMELG--LADVEGLSVLR  
 rNav1.8 VSLLELS--ASKKGSLSVLR

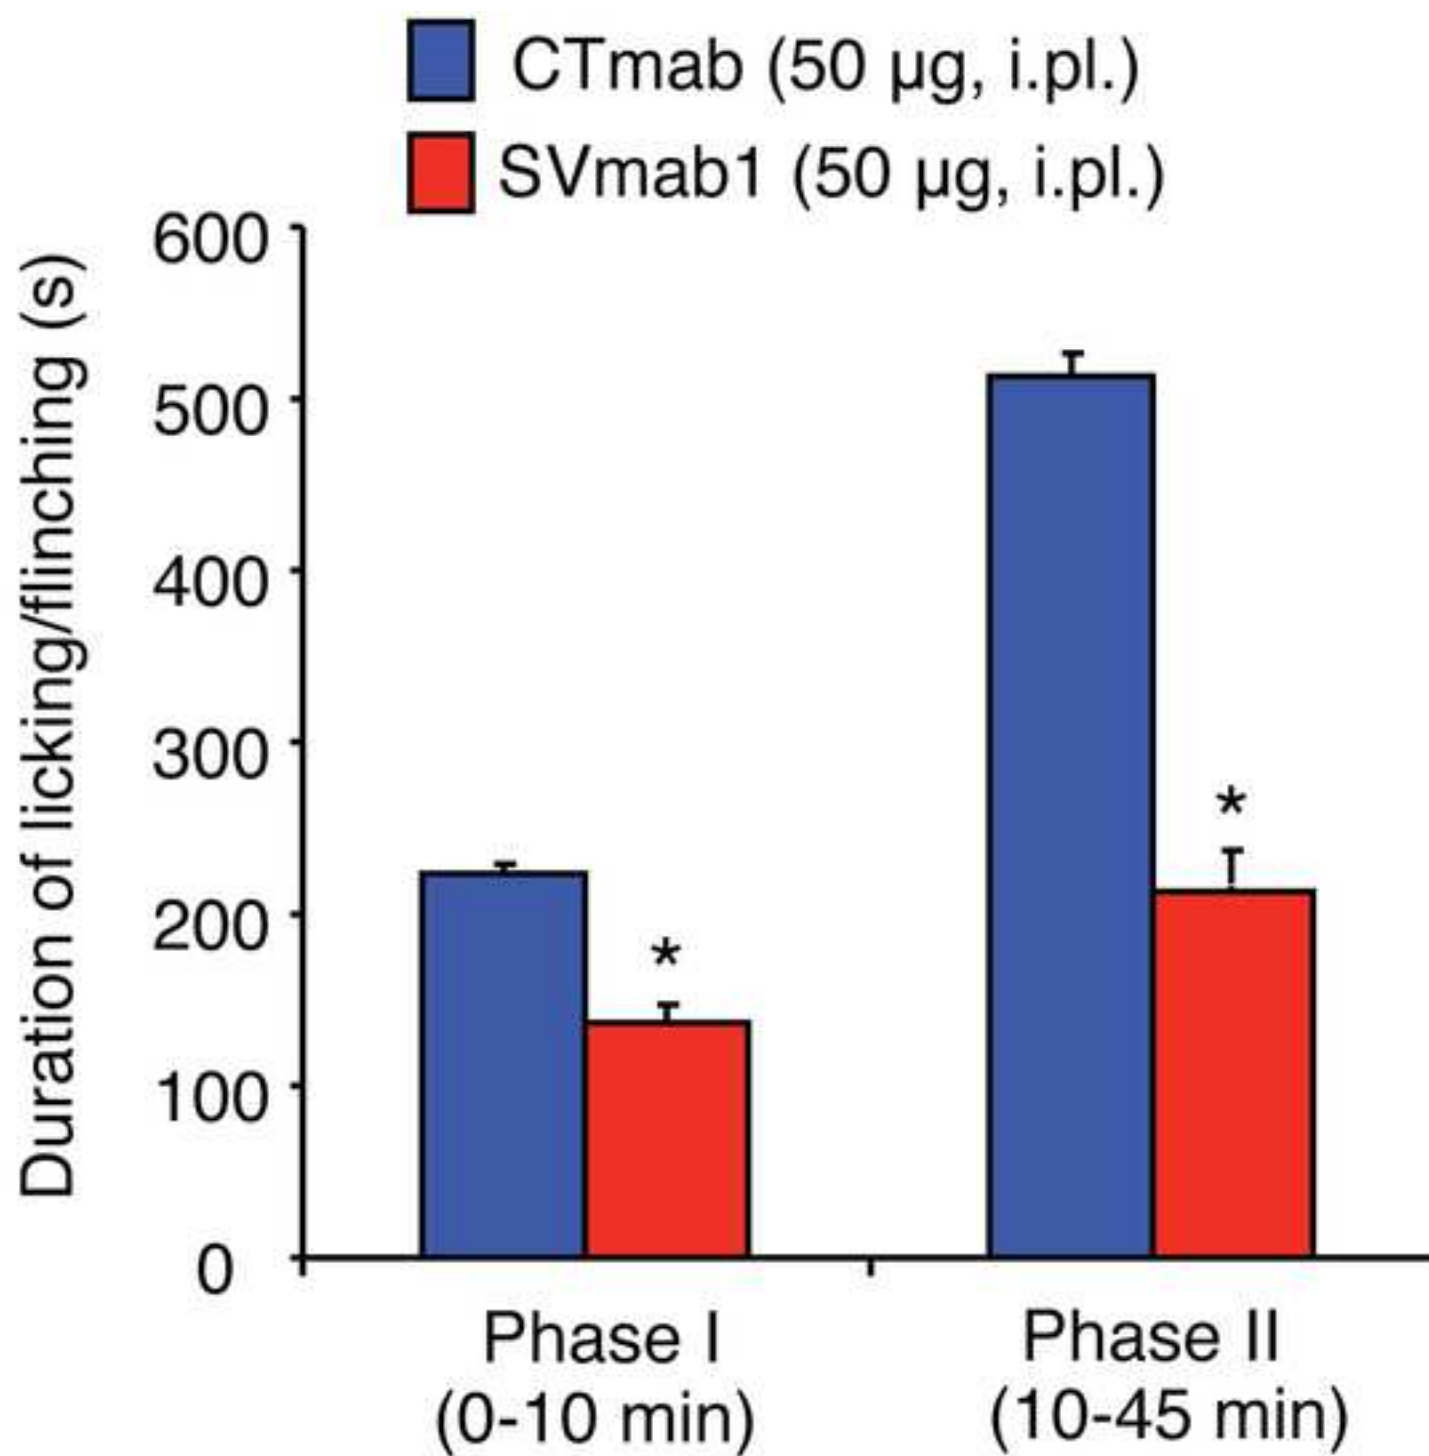

Formalin-induced spontaneous pain

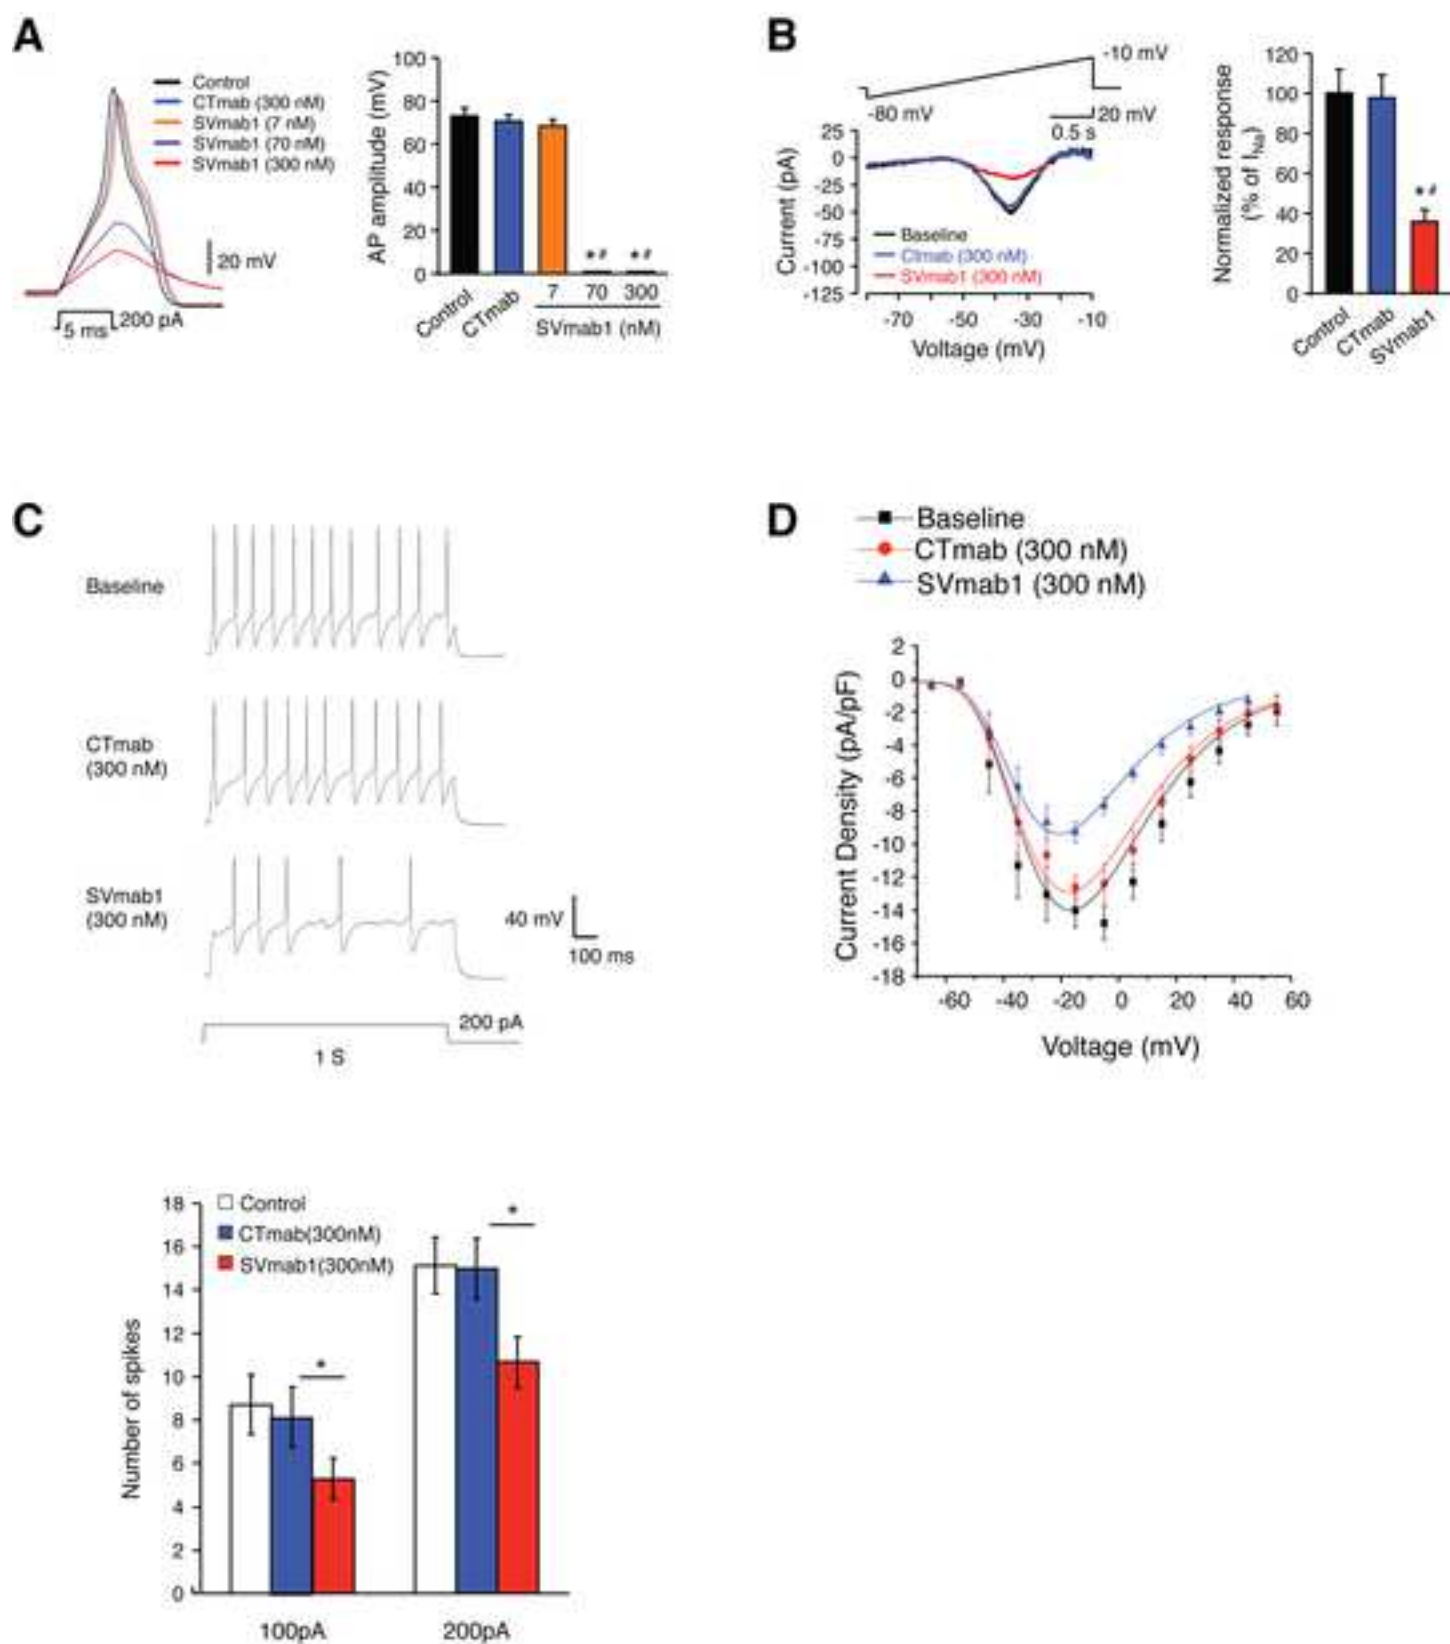

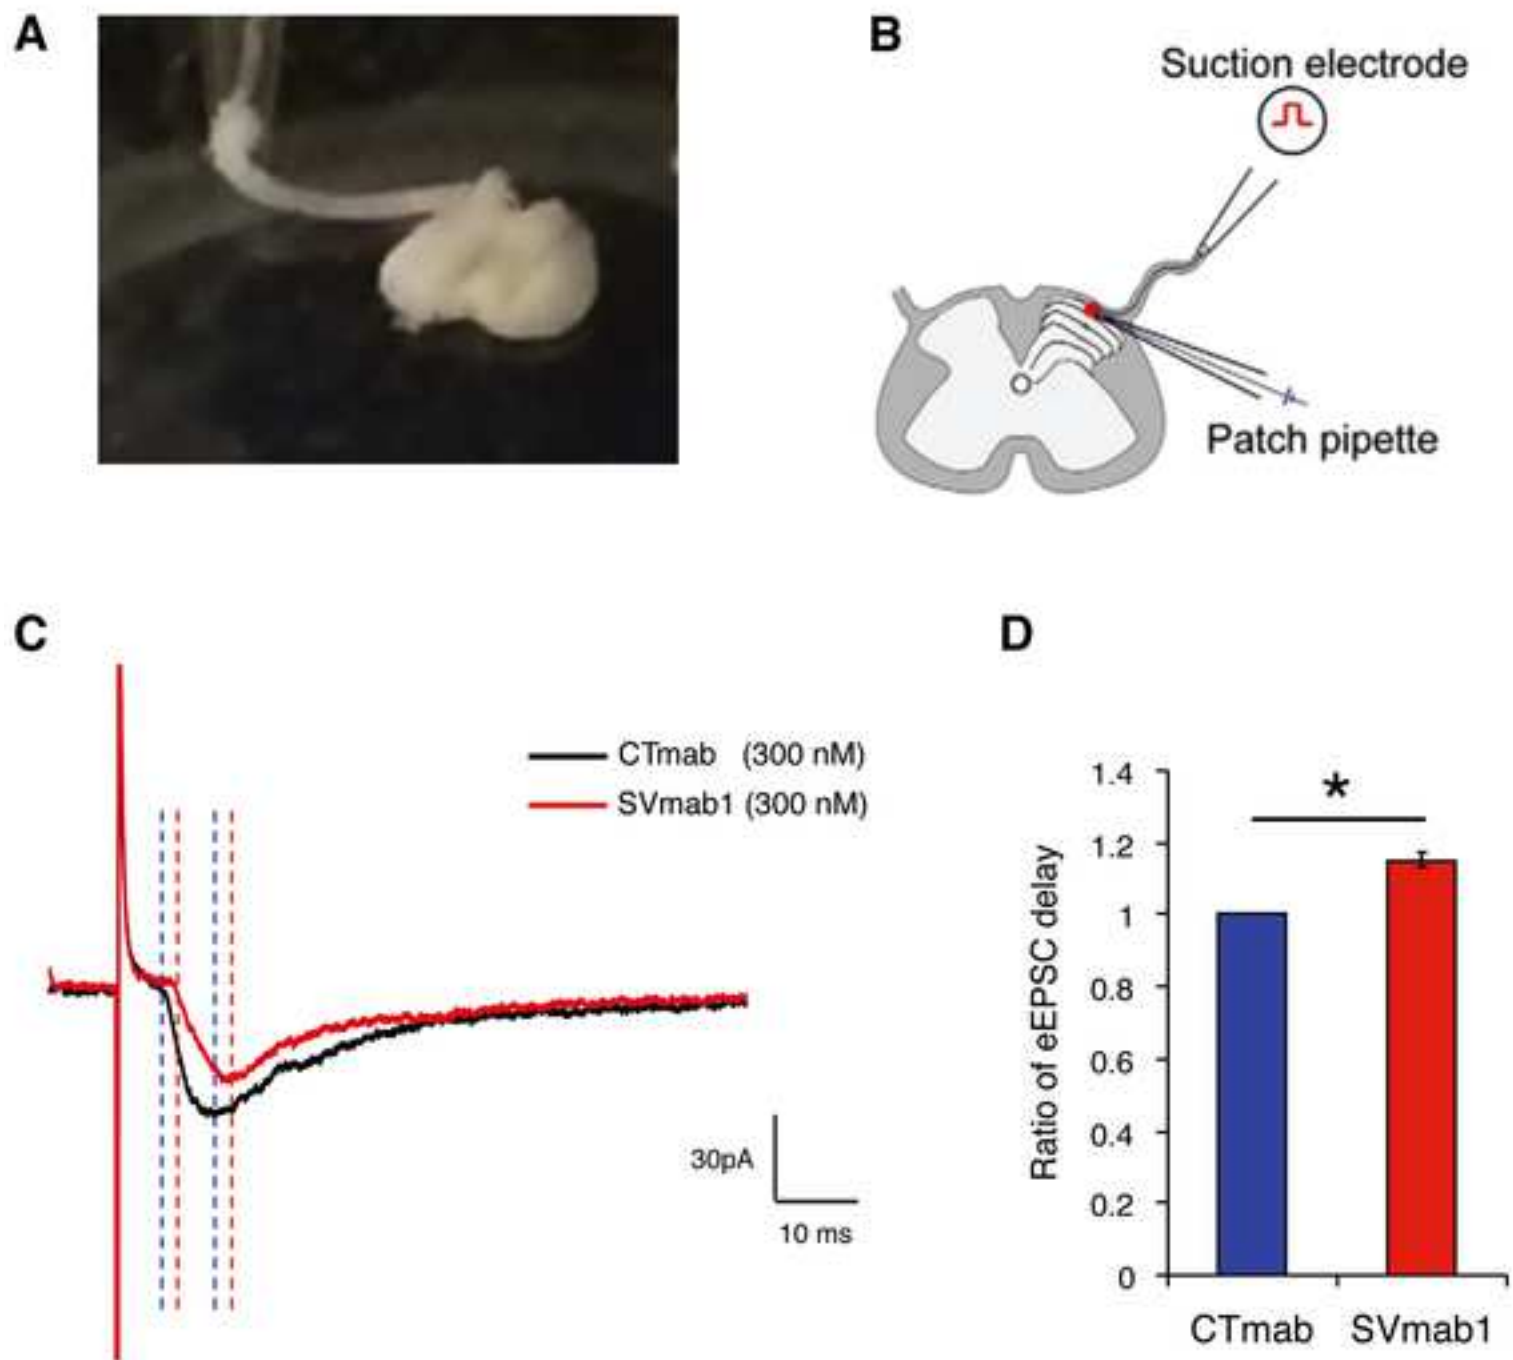

\* Action site of Na<sub>v</sub>1.7 antibody (SVmab1)

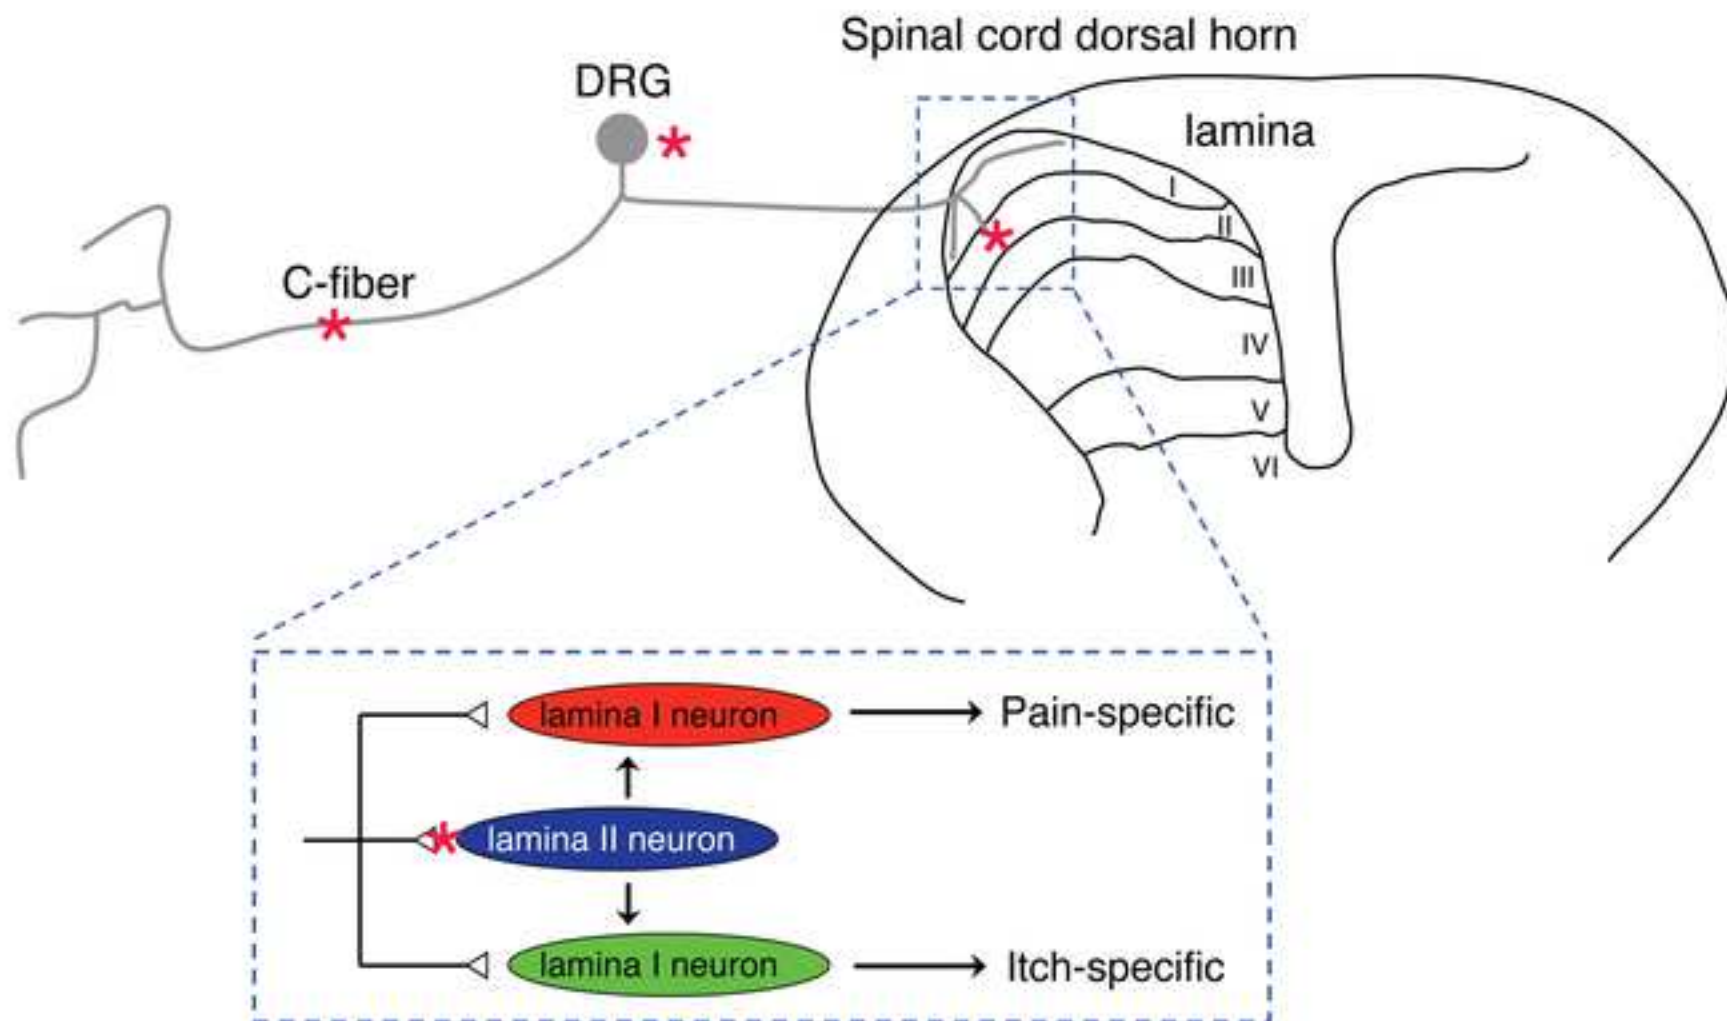

Supplement: NIHMS597714-supplement-02.pdf [file NIHMS597714-supplement-02.pdf]
